# Supplementary material for: A stable rhodium single-site catalyst encapsulated within dendritic mesoporous nanochannels
Source: Royal Society of Chemistry journal article supplement (doi:10.1039/c7nr06258c), 2017-12-06
Supplement: c7nr06258c1.pdf [file c7nr06258c1.pdf]

## **Supporting Information**

### **Stable Rhodium Single-Site Catalyst Encapsulated within Dendritic Mesoporous Nanochannels**

Jun Tian<sup>a,b</sup>, Dali Yang<sup>a,c</sup>, Jianguo Wen<sup>b</sup>, Alexander S. Filatov<sup>d</sup>, Yuzi Liu<sup>b</sup>,  
Aiwen Lei<sup>a,\*</sup>, Xiao-Min Lin<sup>b,\*</sup>

<sup>a</sup> College of Chemistry and Molecular Sciences, the Institute for Advanced Studies (IAS),  
Wuhan University, P.R. China

<sup>b</sup> Center for Nanoscale Materials, Argonne National Laboratory, Argonne, IL 60439, U.S.A.

<sup>c</sup> Chemical Science and Engineering Division, Argonne National Laboratory, Argonne, IL  
60439, U.S.A.

<sup>d</sup> Department of Chemistry, University of Chicago, Chicago, IL 60637, U.S.A.

\*Correspondence to: [aiwenlei@whu.edu.cn](mailto:aiwenlei@whu.edu.cn), [xmlin@anl.gov](mailto:xmlin@anl.gov)

#### **Supplementary Informations**

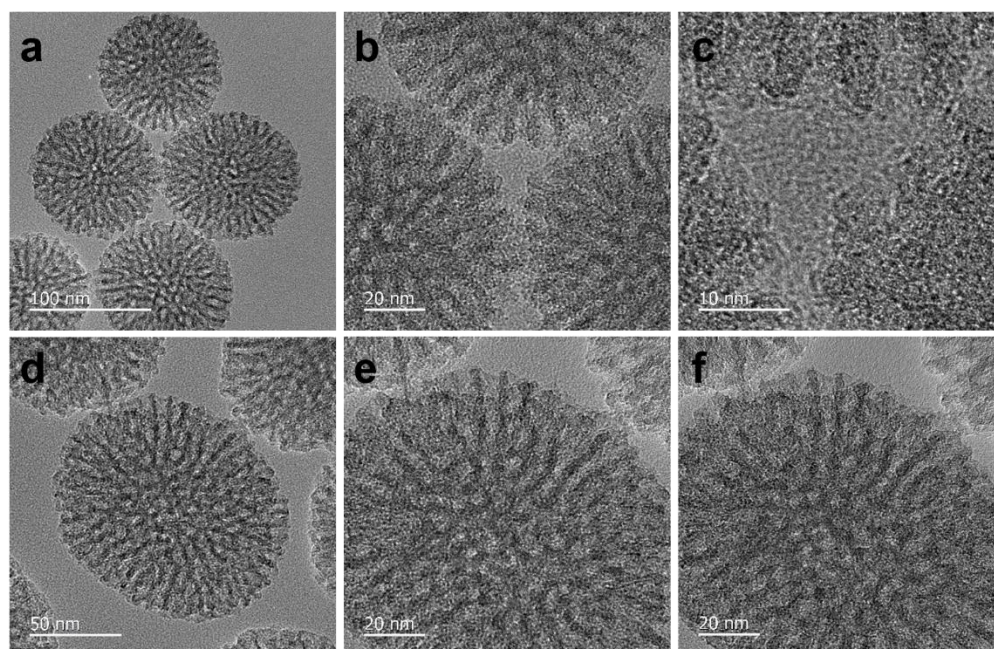

**Fig. S1 More detailed characterizations by TEM:** TEM images (a to f) of the as prepared Rh<sub>1</sub>@MSNS-NH<sub>2</sub>, a-c, one particular area zoomed in with different magnification, d-f another area taken with slight different focus depth.

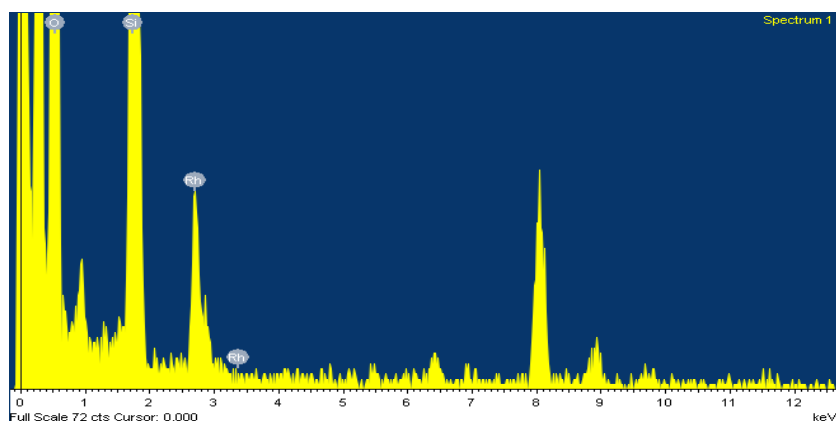

| Element | Weight% | Atomic% |
|---------|---------|---------|
| Si      | 33.46   | 23.27   |
| O       | 62.20   | 75.91   |
| Rh      | 4.33    | 0.82    |

**Fig. S2** EDS spectrum of a selected area in Rh<sub>1</sub>@MSNS-NH<sub>2</sub> sample and the corresponding analysis result.

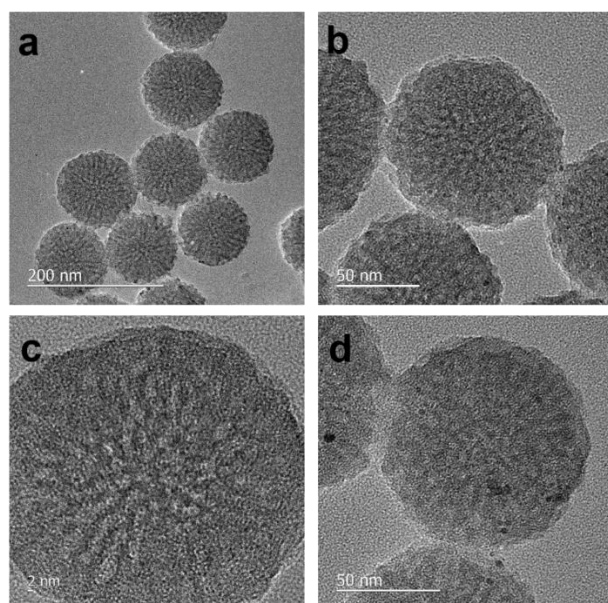

**Fig. S3.** TEM images of the Rh<sub>1</sub>@MSNS-NH<sub>2</sub> after serving as catalyst for the reduction of 4-nitrophenol.

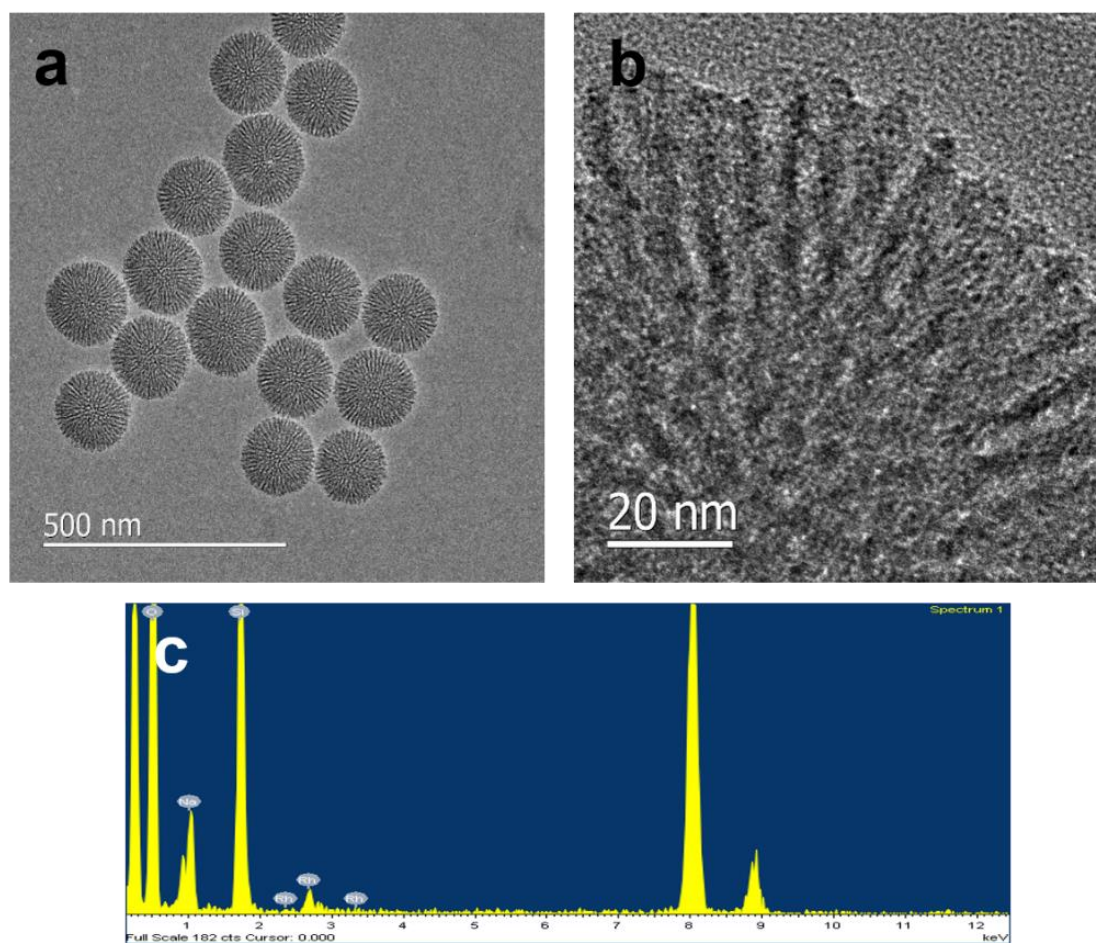

**Fig. S4** TEM images and EDX result of the as-prepared Rh/MSNS without surface functionalization.

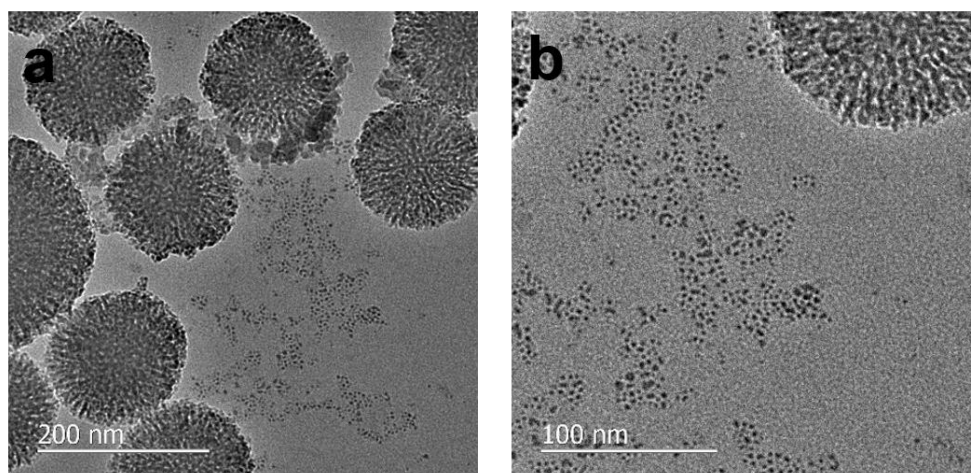

**Fig. S5** TEM images of the Rh/MSNS after serving as catalyst for the reduction of 4-nitrophenol.



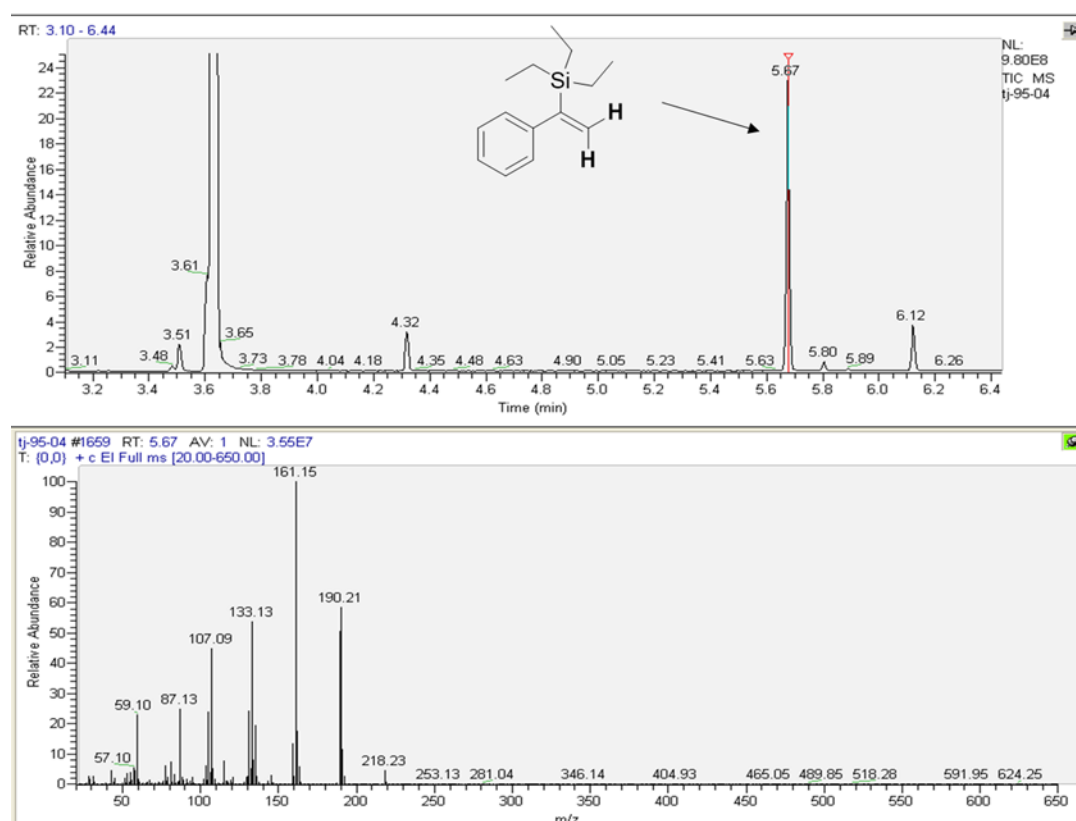

**Fig. S6:** GC-MS result of the reaction product obtained in the hydrosilylation of phenylacetylene with triethylsilane.

### $^1\text{H}$ NMR

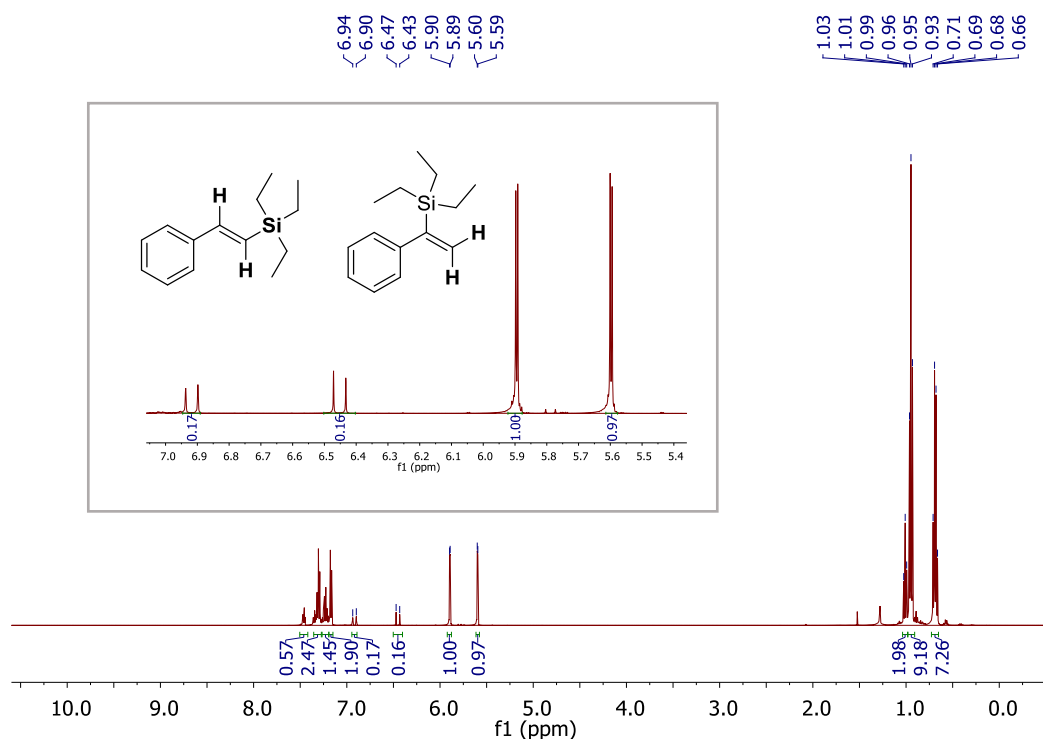

# <sup>13</sup>C NMR

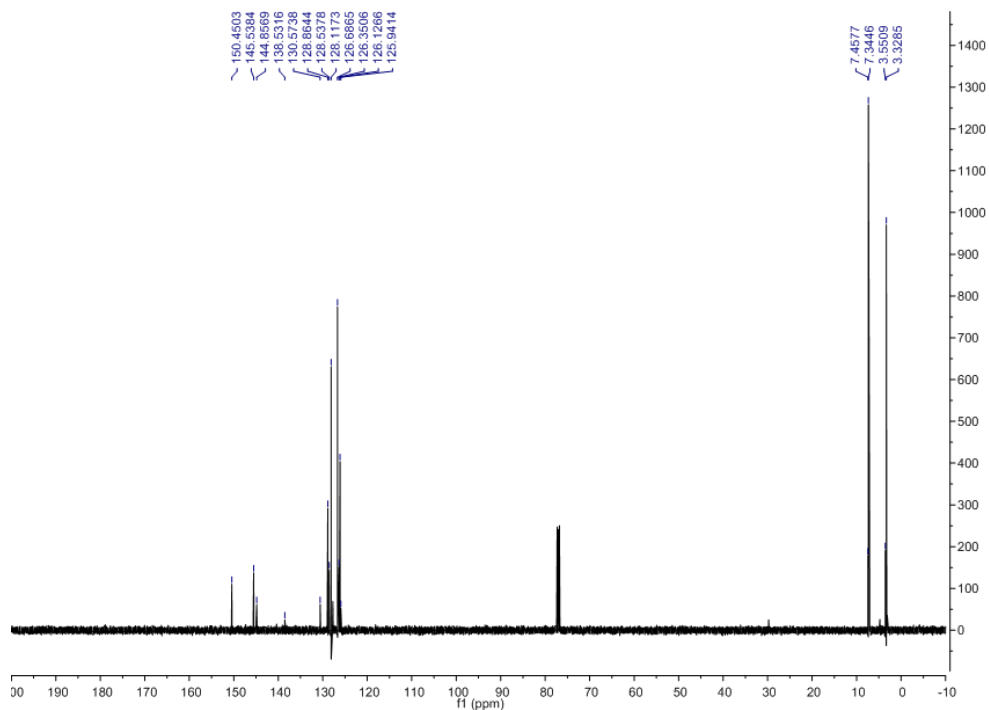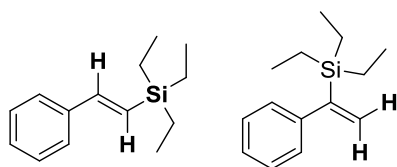

(E)-triethyl(styryl)silane and triethyl(1-phenylvinyl)silane.

<sup>1</sup>H NMR (500 MHz, CDCl<sub>3</sub>) δ 7.50 – 7.42 (m, 0.57H), 7.36 – 7.27 (m, 2.47H), 7.27 – 7.19 (m, 1H), 7.17 (dt, J = 3.0, 1.8 Hz, 2H), 6.92 (d, J = 19.3 Hz, 0.17H), 6.45 (d, J = 19.3 Hz, 0.16H), 5.89 (d, J = 3.1 Hz, 1H), 5.60 (d, J = 3.1 Hz, 1H), 1.01 (t, J = 7.9 Hz, 2H), 0.95 (t, J = 7.9 Hz, 9H), 0.69 (q, J = 7.9 Hz, 7H). <sup>13</sup>C NMR (126 MHz, CDCl<sub>3</sub>) δ 150.45, 145.54, 144.86, 138.53, 130.57, 128.86, 128.54, 128.12, 126.69, 126.35, 126.13, 125.94, 7.46, 7.34, 3.55, 3.33.

**Fig. S7.** <sup>1</sup>H NMR and <sup>13</sup>C NMR spectra of the hydrosilylation reaction product after purification
